# Supplementary material for: Metal–organic framework templated synthesis of Co3O4 nanoparticles for direct glucose and H2O2 detection
Source: Royal Society of Chemistry journal article supplement (doi:10.1039/c2an35954e), 2012-01-01
Supplement: c2an35954e.pdf [file c2an35954e.pdf]

## Supporting Information

### **Metal-Organic Framework Templated Synthesis of Co<sub>3</sub>O<sub>4</sub> Nanoparticles for Direct Glucose and H<sub>2</sub>O<sub>2</sub> Detection**

Chuantao Hou, Qin Xu, Lina Yin and Xiaoya Hu\*

College of Chemistry and Chemical Engineering, Yangzhou University, Yangzhou, 225002, Jiangsu, P. R.  
China

Email: [xyhu@yzu.edu.cn](mailto:xyhu@yzu.edu.cn)

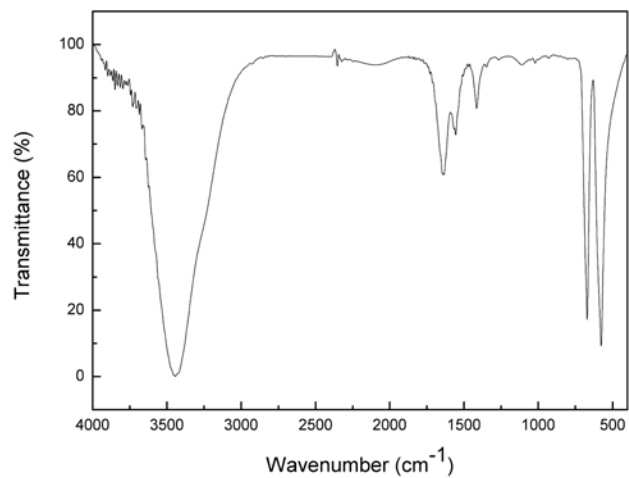

Fig. S1 FT-IR spectrum of the as-synthesized Co<sub>3</sub>O<sub>4</sub> NPs.

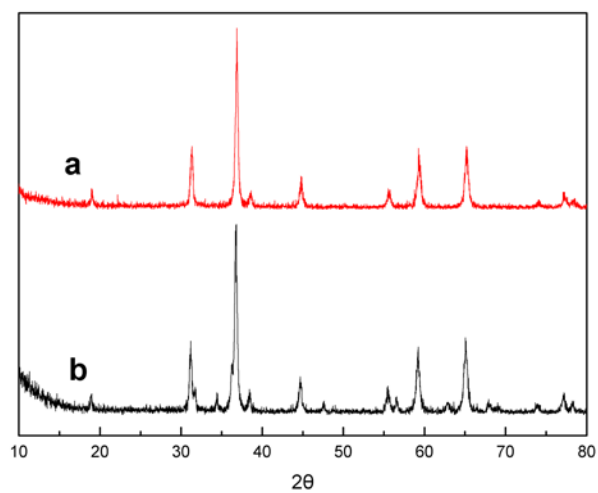

Fig. S2 PXRD patterns of the Co<sub>3</sub>O<sub>4</sub> NPs (a), and Co<sub>3</sub>O<sub>4</sub>@ZnO before dissolution of the zinc oxide (b).

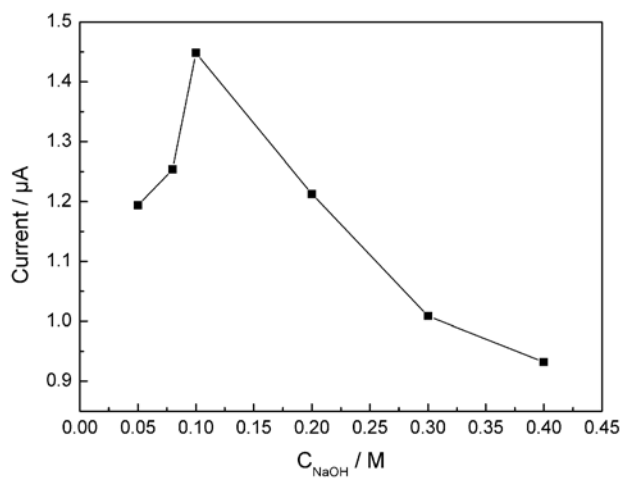

Fig S3 Effects of NaOH concentration on the amperometric responses of the proposed GCE for 10 $\mu\text{M}$  glucose.

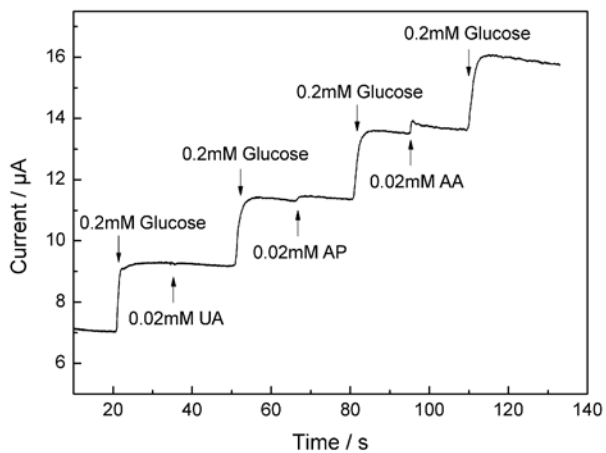

Fig. S4 Amperometric response of the  $\text{Co}_3\text{O}_4$  NPs modified GCE on successive injection of 0.2 mM glucose at different stages and for the addition of 0.02 mM UA, 0.02 mM AP, and 0.02 mM AA to the solution of 0.1 M NaOH.

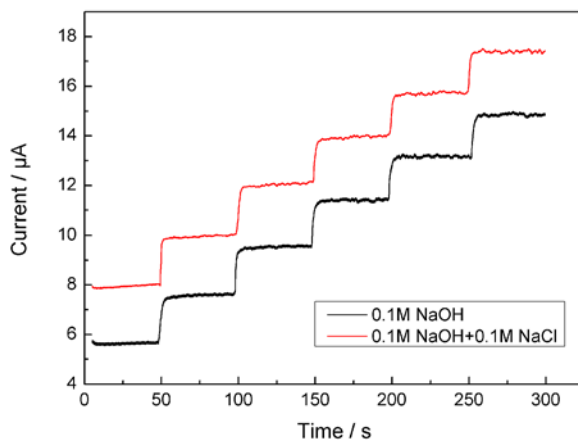

Fig. S5 Amperometric responses of the  $\text{Co}_3\text{O}_4$  NPs modified GCE to successive injection of 0.2mM glucose in 0.1M NaOH and 0.1M NaOH containing 0.1 M NaCl, respectively.

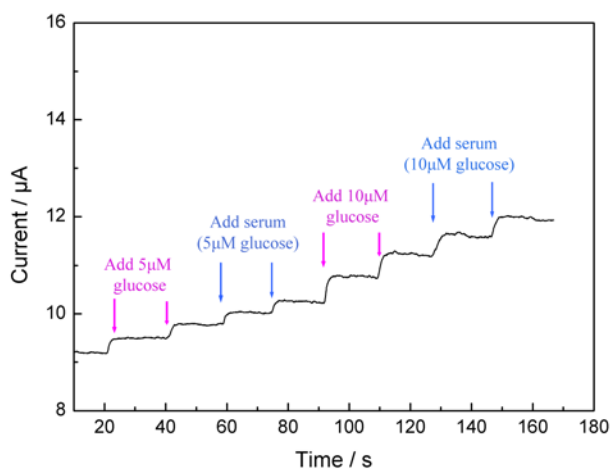

Fig. S6 Amperometric response of the  $\text{Co}_3\text{O}_4$  NPs modified GCE with successive additions of glucose solution and serum sample.
